# Supplementary material for: Early molecular correlates of adverse events following yellow fever vaccination
Source: JCI journal article supplement (doi:10.1172/jci.insight.96031), 2017-10-04
Supplement: sd1 [file 1]

1     **Supplementary Figures**

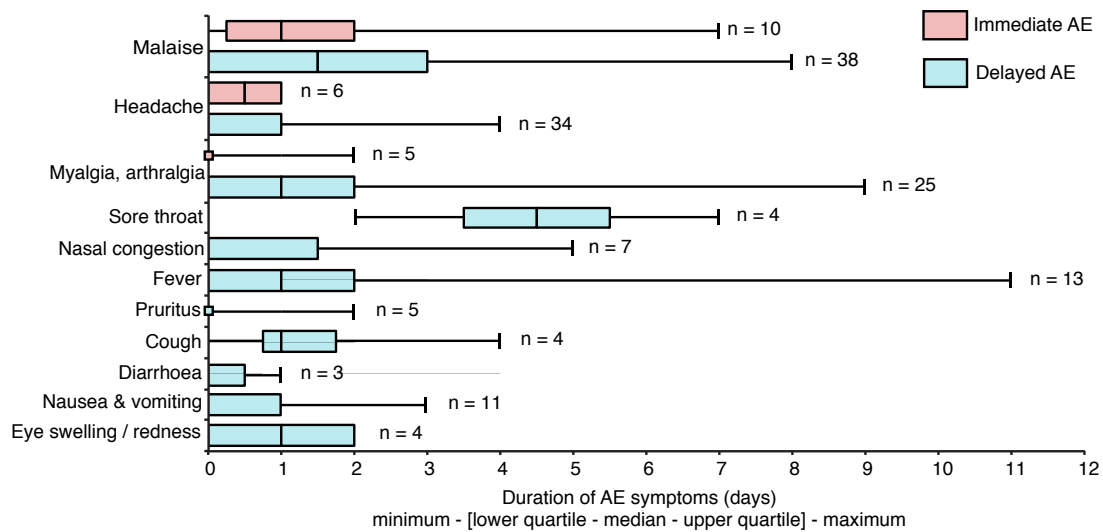

2

3     **Supplementary Figure 1. Duration of AEs.**

4     Box-and-whisker plot showing the duration of AEs following YF vaccination. Red bars  
5     represent immediate AEs that  $\leq 24$  hours post-YF vaccination. Blue bars represent  
6     delayed AEs that  $> 24$  hours post-YF vaccination. The line within the box indicates the  
7     median, the end of the box shows the 25<sup>th</sup> and 75<sup>th</sup> percentile. Ends of the whiskers are  
8     minimum and maximum. Only events reported more than once are shown.  $n$  = number  
9     of AEs.

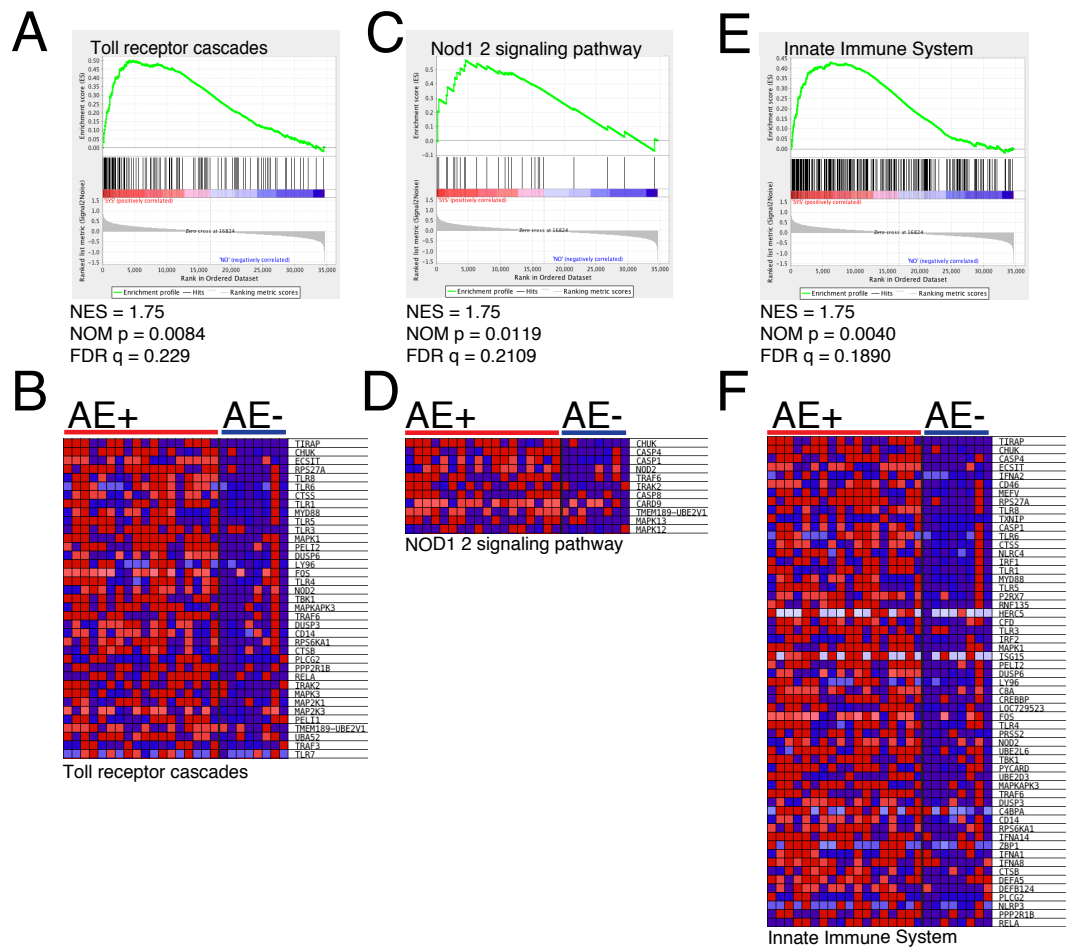

10

11 **Supplementary Figure 2. Upregulation of innate immune response related**  
 12 **genes in subjects with systemic AEs.** GSEA analysis of AEs following YF  
 13 vaccination from venous blood microarray data in 18 subjects with delayed systemic  
 14 AE (AE+) compared to 8 subjects without AE (AE-) at day 1 post-YF vaccination.  
 15 Enrichment plots (**A**, **C**, **E**) and blue-pink o'grams (**B**, **D**, **F**) for the leading-edge  
 16 subset of genes of these top 3 gene-sets by normalized enrichment scores (NES):  
 17 toll receptor cascades, NOD 1 2 signaling pathway, and innate immune system. FDR  
 18 q-values and nominal (NOM) p-values are shown.

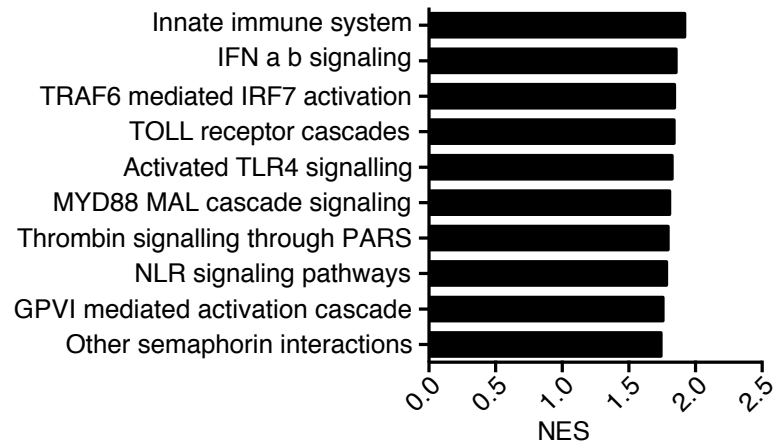

19

20 **Supplementary Figure 3.** Top 10 enriched gene-sets from venous blood microarray  
 21 data in subjects with only delayed AEs ( $n = 12$ ) compared with subjects without AEs  
 22 ( $n = 8$ ), ranked by normalized enrichment scores (NES), with FDR q-values  $< 0.25$  on  
 23 day 1 post-YF vaccination.

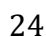

27 (A) Top enriched gene-sets from venous blood microarray data in subjects with  
28 delayed probable systemic AEs ( $n = 7$ ) compared with subjects without AEs ( $n = 8$ ),  
29 ranked by normalized enrichment scores (NES), with FDR q-values  $< 0.25$  on day 1  
30 post-YFLAV. (B) Top 10 enriched gene-sets from venous blood microarray data  
31 ranked by NES at day 1 post-YF vaccination in subjects with only delayed possible ( $n$   
32  $= 11$ ), or no AEs ( $n = 8$ ). Dotted line represents the cut-off FDR q-value of 0.25. (C)  
33 **Heatmap** of microarray data showing fold-changes observed at day 1 versus day 0  
34 for genes in the toll receptor cascades, IFN and interleukins (ILS) signaling in  
35 subjects with probable ( $n = 7$ ), possible ( $n = 11$ ), and without systemic AEs ( $n = 8$ )  
36 post-YFLAV.

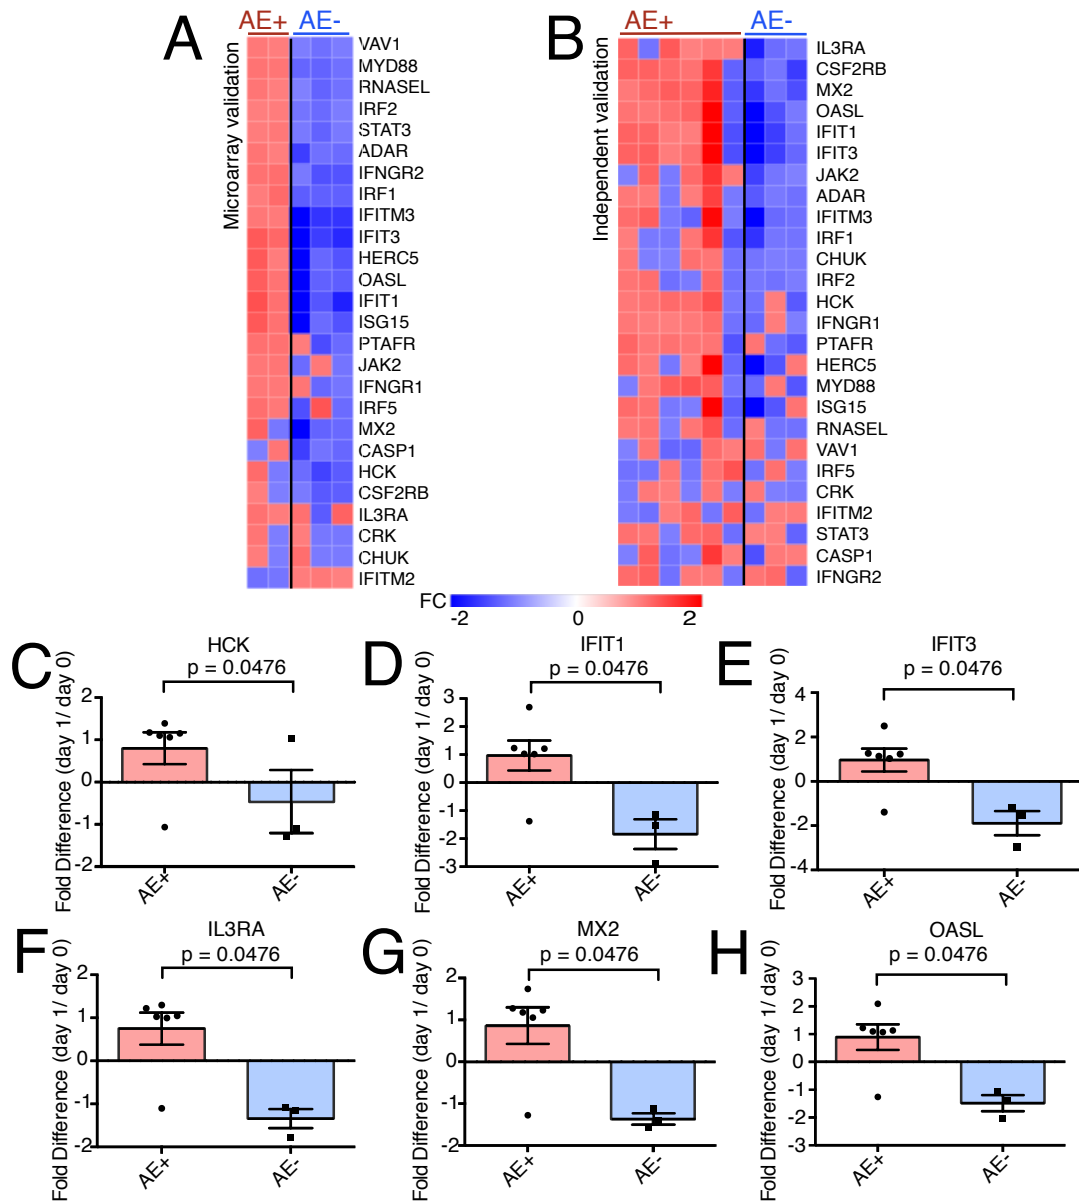

**Supplementary Figure 5. NCounter validation of the microarray results.**

Heatmap of fold change (day 1 versus day 0) for (A) 2 subjects with AE (AE+) and 3 without AE (AE-), who were included in the microarray analysis and (B) independent validation for 6 subjects with AE (AE+) and 3 without (AE-) following vaccination. From independent validation, genes that have  $p < 0.05$  between the AE+ (red) and AE- (blue) groups were: (C) *HCK*, (D) *IFIT1*, (E) *IFIT3*, (F) *IL3RA*, (G) *MX2*, and (H) *OASL*. P-value: Unpaired Mann-Whitney U-test. Error bars: mean  $\pm$  SEM.



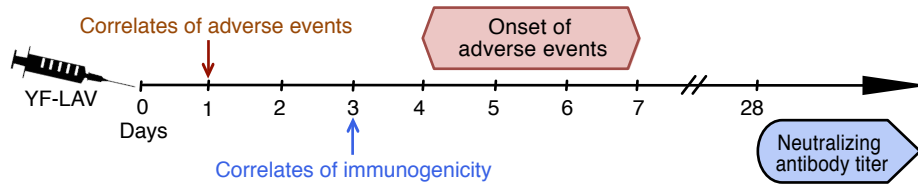

56

57 **Supplementary Figure 7. Proposed molecular processes leading to**  
 58 **adverse events and immunogenicity following YFLAV administration.**

59 Following YF vaccination, up-regulation of innate immune genes may mediate  
 60 both YF vaccine-associated AEs and immunogenicity. However, the timings of  
 61 activation of these pathways are temporally separated. Early activation on day 1 is  
 62 associated with the development of systemic AEs (median day 6, interquartile  
 63 range days 4–7), while responses at day 3 shape the magnitude, quality, and  
 64 durability of the neutralizing antibody response (immunogenicity).
