# Supplementary material for: Early molecular correlates of adverse events following yellow fever vaccination
Source: JCI journal article supplement (doi:10.1172/jci.insight.96031), 2017-10-04
Supplement: sd2 [file 2]

## Supplementary tables

| Subjects<br>(N = 68)                         | All SYS AE (n = 43) |                |
|----------------------------------------------|---------------------|----------------|
|                                              | Probable            | Possible       |
| <b>Subjects (%)</b>                          | 14<br>(32.6)        | 29<br>(67.4)   |
| <b>Age (in years)</b><br>Median<br>(range)   | 30<br>21 – 40       | 29<br>23 - 50  |
| <b>Gender</b><br><b>Male (%)</b>             | 9<br>(64.3)         | 16<br>(55.2)   |
| <b>Ethnicity</b><br><b>n (%)</b>             |                     |                |
| Chinese                                      | 10<br>(71.4)        | 22<br>(75.9)   |
| Malay                                        | 2 (14.3)            | 2 (6.9)        |
| Indian                                       | 0 (0)               | 3 (10.3)       |
| Others <sup>A</sup>                          | 2 (14.3)            | 2 (6.9)        |
| <b>BMI kg/m<sup>2</sup></b><br>Mean<br>(±SD) | 22.1<br>(±2.8)      | 22.0<br>(±3.0) |

**Supplementary Table 1. Demographics of subjects with possible and probable systemic AEs.** Age, gender, ethnicity and BMI of the subjects that have completed the trial and analyzed for AEs attributed to YFLAV (N = 68). Those with systemic AEs are further subdivided by probable, or possible relatedness to YFLAV.

| Gene-set name                                                                | NES    | NOM p-value | FDR q-value |
|------------------------------------------------------------------------------|--------|-------------|-------------|
| Toll receptor cascade                                                        | 1.7540 | 0.0084      | 0.2287      |
| NOD1 2 signaling pathway                                                     | 1.7501 | 0.0119      | 0.2108      |
| Innate immune system                                                         | 1.7489 | 0.0040      | 0.1891      |
| Interferon signaling                                                         | 1.7243 | 0.0084      | 0.2206 f    |
| Thrombin signaling through proteinase activated receptor PAR2                | 1.7060 | 0.0096      | 0.2433      |
| Signaling by ILS                                                             | 1.6905 | 0.0281      | 0.2389      |
| TRAF6 mediated IRF7 activation                                               | 1.6881 | 0.0103      | 0.2266      |
| Activated TAK1 mediates p38 MAPK activation                                  | 1.6860 | 0.0041      | 0.2160      |
| TRAF6 mediated induction of NFkB and MAP kinases upon TLR7 8 or 9 activation | 1.6744 | 0.0124      | 0.2283      |
| ADP signaling through P2RY12                                                 | 1.6720 | 0.0057      | 0.2184      |
| Circadian repression of expression by Rev ErbA                               | 1.6680 | 0.0142      | 0.2131      |
| G beta $\gamma$ signaling through PLC $\beta$                                | 1.6594 | 0.0091      | 0.2173      |
| Prostacyclin signaling through prostacyclin receptor                         | 1.6385 | 0.0112      | 0.2478      |
| Signaling by hippo                                                           | 1.6098 | 0.0115      | 0.24830     |

**Supplementary Table 2. GSEA findings of systemic AEs following YF vaccination.** Summary of up-regulated gene-sets from venous blood microarray data in subjects with delayed AEs ( $n = 18$ ) compared to subjects without AEs ( $n = 8$ ), at day 1 versus day 0 post-vaccination. Gene-sets with FDR  $q < 0.25$ , ranked based on normalized enrichment scores (NES). Nominal (NOM) p-values of the gene sets are shown.
